# Supplementary material for: Mosaic Activating Mutations in GNA11 and GNAQ Are Associated with Phakomatosis Pigmentovascularis and Extensive Dermal Melanocytosis
Source: PubMed Central journal article supplement (PMC4803466; doi:10.1016/j.jid.2015.11.027), 2016-04
Supplement: mmc1.pdf [file mmc1.pdf]

## Supplementary table 1

Published clinical classifications of phakomatosis pigmentovascularis, based on the types of vascular and pigmentary birthmarks

| <b>Vascular lesions</b>                                                                                                           | <b>Pigmentary lesions</b>                                    | <b>Classification 1(1)</b> | <b>Classification 2(2)</b>                            |
|-----------------------------------------------------------------------------------------------------------------------------------|--------------------------------------------------------------|----------------------------|-------------------------------------------------------|
| Capillary malformation (port wine stain/naevus flammeus)                                                                          | Linear epidermal naevus                                      | Type I                     | Not included in this classification                   |
| Capillary malformation (port wine stain/naevus flammeus)                                                                          | Dermal melanocytosis (Mongolian blue spot)                   | Type II                    | 'Cesioflammea' type                                   |
| Capillary malformation (port wine stain/naevus flammeus in classification 1, pale pink telangiectatic naevus in classification 2) | Naevus spilus                                                | Type III                   | 'Spilorosea' type                                     |
| Capillary malformation (port wine stain/naevus flammeus)                                                                          | Dermal melanocytosis (Mongolian blue spot) and naevus spilus | Type IV                    | Extremely rare, unclassifiable in this classification |
| Capillary malformation (cutis marmorata telangiectatica congenita)                                                                | Dermal melanocytosis (Mongolian blue spot)                   | Type V                     | 'Cesiomarmorata' type                                 |

## **Supplementary table 2**

Mutant allele count and percentage of mosaicism for each of the samples tested by the next generation sequencing method. Please note where percentage mosaicism is lower than 1% it is not possible to distinguish this from background noise, and therefore these are considered as wild-type.

| Patient # in table 1 | gDNA (hg19)        | cDNA                 | aa change                   | Reference allele count | Alternative allele count | Total allele count | Percent mosaicism | Sample origin | Comments                                         | Sequenced first by Sanger/digest method |
|----------------------|--------------------|----------------------|-----------------------------|------------------------|--------------------------|--------------------|-------------------|---------------|--------------------------------------------------|-----------------------------------------|
| 1                    | chr19:g.3115012C>T | NM_002067.2:c.547C>T | <i>GNA11</i><br>p.Arg183Cys | 3749                   | 209                      | 3958               | 5.3               | Skin          |                                                  | No                                      |
| 1                    | chr19:g.3115012C>T | NM_002067.2:c.547C>T | <i>GNA11</i><br>p.Arg183Cys | 1349                   | 0                        | 1349               | 0.0               | Blood         |                                                  | No                                      |
| 2                    | chr19:g.3115012C>A | NM_002067.2:c.547C>A | <i>GNA11</i><br>p.Arg183Ser | 6018                   | 515                      | 6533               | 7.9               | Cheek swab    |                                                  | Yes                                     |
| 3                    | chr9:g.80412493C>T | NM_002072.3:c.548G>A | <i>GNAQ</i><br>p.Arg183Gln  | 29396                  | 2005                     | 31401              | 6.4               | Skin          |                                                  | Yes                                     |
| 3                    | chr9:g.80412493C>T | NM_002072.3:c.548G>A | <i>GNAQ</i><br>p.Arg183Gln  | 3870                   | 0                        | 3870               | 0.0               | Blood         |                                                  | Yes                                     |
| 3                    | chr9:g.80412493C>T | NM_002072.3:c.548G>A | <i>GNAQ</i><br>p.Arg183Gln  | 24044                  | 2983                     | 27027              | 11.0              | Ocular tissue |                                                  | Yes                                     |
| 4                    | chr9:g.80412493C>T | NM_002072.3:c.548G>A | <i>GNAQ</i><br>p.Arg183Gln  | 16439                  | 858                      | 17297              | 5.0               | Skin          |                                                  | No                                      |
| 4                    | chr9:g.80412493C>T | NM_002072.3:c.548G>A | <i>GNAQ</i><br>p.Arg183Gln  | 33632                  | 8                        | 33640              | 0.0               | Blood         |                                                  | No                                      |
| 5                    | -                  | -                    | -                           | -                      | -                        | -                  | -                 | Skin          | No mutation found in <i>GNA11</i> or <i>GNAQ</i> | No                                      |
| 6                    | chr19:g.3115012C>T | NM_002067.2:c.547C>T | <i>GNA11</i><br>p.Arg183Cys |                        |                          |                    |                   | Skin          | MiSeq failed                                     | Yes                                     |
| 7                    | -                  | -                    | -                           | -                      | -                        | -                  | -                 | Skin          | No mutation found in <i>GNA11</i> or <i>GNAQ</i> | Yes                                     |
| 8                    | chr19:g.3115012C>T | NM_002067.2:c.547C>T | <i>GNA11</i>                | 16631                  | 3054                     | 19685              | 15.5              | Skin          |                                                  | Yes                                     |

|    |                    |                      |                             |       |      |       |     |       |                                                  |     |
|----|--------------------|----------------------|-----------------------------|-------|------|-------|-----|-------|--------------------------------------------------|-----|
|    |                    |                      | p.Arg183Cys                 |       |      |       |     |       |                                                  |     |
| 8  | chr19:g.3115012C>T | NM_002067.2:c.547C>T | <i>GNA11</i><br>p.Arg183Cys | 7861  | 834  | 8695  | 9.6 | Skin  |                                                  | Yes |
| 8  | chr19:g.3115012C>T | NM_002067.2:c.547C>T | <i>GNA11</i><br>p.Arg183Cys | 8163  | 25   | 8188  | 0.3 | Blood |                                                  | Yes |
| 8  | chr19:g.3115012C>T | NM_002067.2:c.547C>T | <i>GNA11</i><br>p.Arg183Cys | 10727 | 35   | 10762 | 0.3 | Blood |                                                  | Yes |
| 9  | chr9:g.80412493C>T | NM_002072.3:c.548G>A | <i>GNAQ</i><br>p.Arg183Gln  | 16670 | 332  | 17002 | 2.0 | Skin  |                                                  | Yes |
| 9  | chr9:g.80412493C>T | NM_002072.3:c.548G>A | <i>GNAQ</i><br>p.Arg183Gln  | 6212  | 9    | 6221  | 0.1 | Blood |                                                  |     |
| 10 | chr9:g.80409488T>G | NM_002072.2:c.626A>C | <i>GNAQ</i><br>p.Gln209Pro  | 21187 | 1269 | 22456 | 5.7 | Skin  |                                                  | No  |
| 10 | chr9:g.80409488T>G | NM_002072.2:c.626A>C | <i>GNAQ</i><br>p.Gln209Pro  | 42942 | 6    | 42948 | 0.0 | Blood |                                                  |     |
| 11 | -                  | -                    | -                           | -     | -    | -     | -   | Skin  | No mutation found in <i>GNA11</i> or <i>GNAQ</i> | No  |

### Supplementary table 3

Primer sequences and restriction enzymes for selective amplification of mutant alleles at hotspots in *GNA11* and *GNAQ*

| Hotspot                | First and second PCR forward primer | First PCR reverse primer | Second PCR reverse primer | Restriction enzyme                             |
|------------------------|-------------------------------------|--------------------------|---------------------------|------------------------------------------------|
| <i>GNA11</i> codon 183 | TACCTGACCGACGTTGACC                 | GGTGGTCTCAAACCTCCTGGA    | ACACCGGGCAAATGAGC         | BstUI (New England BioLabs®)                   |
| <i>GNA11</i> codon 209 | TGGTGGATGTGGGGGGCCAGTGGTC           | CCGGCGCACCATCGAA         | CTTGGCAGGTGGGGAAGG        | BsrI (New England BioLabs®)                    |
| <i>GNAQ</i> codon 183  | TCCCTTTCCGTAGACAGCTT                | TGAAGCCTACACATGATTCCAG   | TGAAGCCTACACATGATTCCAG    | HinI (New England BioLabs®)                    |
| <i>GNAQ</i> codon 209  | TCATGATGTGTTACCCAGAATGT             | CCATTCCCCACACCTACTT      |                           | Not used due to difficulties in designing site |

### **Supplementary references**

1. Hasegawa Y, Yasuhara, M. A variant of phakomatosis pigmentovascularis. *Skin Research*. 1979;21(178-86).
2. Happle R. Phacomatosis pigmentovascularis revisited and reclassified. *Archives of Dermatology*. 2005;141(3):385-8.
